# Supplementary material for: Life Satisfaction and Instagram Addiction among University Students during the COVID-19 Pandemic: The Bidirectional Mediating Role of Loneliness
Source: MDPI journal article supplement (doi:10.3390/ijerph19148414), 2022-07-09
Supplement: s1 [file s1]

## SUPPLEMENTARY MATERIALS

**Table S1.** Descriptive statistics ( $N = 954$ )

| Variable             | Range | <i>M</i> | <i>SD</i> | Median | Skewness | Kurtosis |
|----------------------|-------|----------|-----------|--------|----------|----------|
| Instagram addiction  | 6-30  | 16.43    | 6.41      | 16     | 0.23     | −0.88    |
| Life satisfaction    | 5-35  | 20.71    | 6.74      | 21     | −0.24    | −0.65    |
| Loneliness general   | 0-11  | 5.65     | 3.52      | 6      | −0.04    | −1.26    |
| Emotional loneliness | 0-6   | 3.26     | 2.09      | 3      | −0.15    | −1.32    |
| Social loneliness    | 0-5   | 2.39     | 1.78      | 2      | 0.10     | −1.35    |

**Table S2.** Model A validity measures for Instagram addiction, life satisfaction, and general loneliness ( $N = 954$ )

| Variable               | $\alpha$ | CR    | AVE   | MSV   | Correlations <i>r</i> |              |              | HTMT  |       |
|------------------------|----------|-------|-------|-------|-----------------------|--------------|--------------|-------|-------|
|                        |          |       |       |       | 1                     | 2            | 3            | 1     | 2     |
| 1. Instagram addiction | 0.865    | 0.860 | 0.509 | 0.030 | <b>0.713</b>          |              |              |       |       |
| 2. Life satisfaction   | 0.882    | 0.888 | 0.615 | 0.249 | −0.157***             | <b>0.784</b> |              | 0.000 |       |
| 3. Loneliness general  | 0.867    | 0.898 | 0.815 | 0.249 | 0.172***              | −0.499***    | <b>0.903</b> | 0.154 | 0.000 |

*Note.*  $\alpha$  = Cronbach's  $\alpha$ , CR = composite reliability, AVE = average variance extracted, MSV = maximum shared variance, HTMT = heterotrait-monotrait, numbers in bold are the square root of the AVE. \*\*\* $p < 0.001$

**Table S3.** Model B validity measures for Instagram addiction, life satisfaction, emotional loneliness, and social loneliness ( $N = 954$ )

| Variable                | $\alpha$ | CR    | AVE   | MSV   | Correlations <i>r</i> |              |              |              | HTMT  |       |       |
|-------------------------|----------|-------|-------|-------|-----------------------|--------------|--------------|--------------|-------|-------|-------|
|                         |          |       |       |       | 1                     | 2            | 3            | 4            | 1     | 2     | 3     |
| 1. Instagram addiction  | 0.865    | 0.860 | 0.509 | 0.038 | <b>0.713</b>          |              |              |              |       |       |       |
| 2. Life satisfaction    | 0.882    | 0.888 | 0.615 | 0.232 | −0.157***             | <b>0.784</b> |              |              | 0.000 |       |       |
| 3. Emotional loneliness | 0.798    | 0.799 | 0.400 | 0.656 | 0.195***              | −0.481***    | <b>0.633</b> |              | 0.196 | 0.000 |       |
| 4. Social loneliness    | 0.790    | 0.809 | 0.461 | 0.656 | 0.098*                | −0.415***    | 0.810***     | <b>0.679</b> | 0.090 | 0.000 | 0.828 |

*Note.*  $\alpha$  = Cronbach's  $\alpha$ , CR = composite reliability, AVE = average variance extracted, MSV = maximum shared variance, HTMT = heterotrait-monotrait, numbers in bold are the square root of the AVE. \* $p < 0.05$ , \*\*\* $p < 0.001$ .

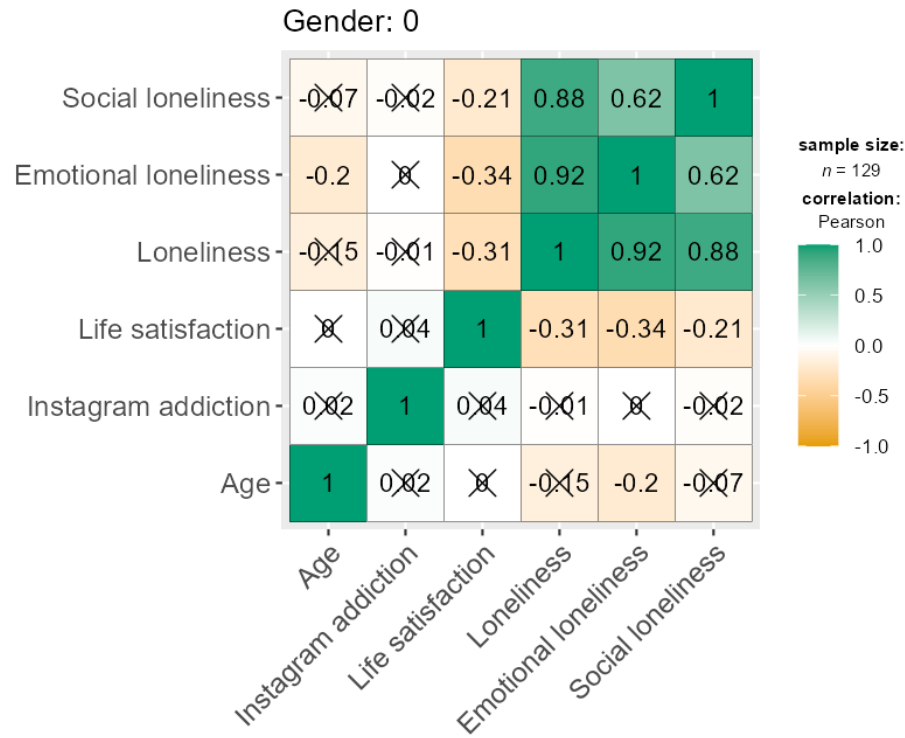

X = non-significant at  $p < 0.05$  (Adjustment: None)

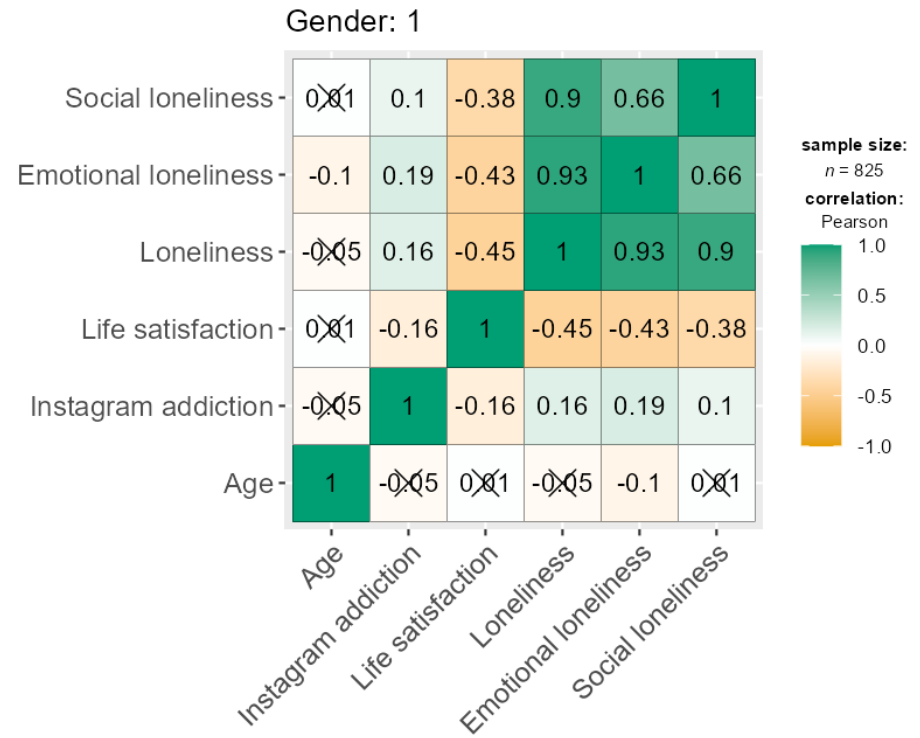

X = non-significant at  $p < 0.05$  (Adjustment: None)

**Figure S1.** Correlation matrix for gender differences (Men = 0,  $n = 129$ ; Women = 1,  $n = 825$ ).
